# Supplementary material for: Deep learning from multiple experts improves identification of amyloid neuropathologies
Source: Acta Neuropathol Commun. 2022 Apr 28;10:66. doi: 10.1186/s40478-022-01365-0 (PMC9052651; doi:10.1186/s40478-022-01365-0)
Supplement: Supplementary file 2 — Additional file 2. Contains the meta data for all WSIs. [file 40478_2022_1365_MOESM2_ESM.csv]

Slide ID	Site	stain	age at death	gender	Ethnoracial group	PMI (hrs)	AD neuropathologic change (Not, Low, Intermediate, High)	CAA present on slide?	Additional Clinicopathological diagnosis (i.e. VaD, LBD.)	Thal Amyloid phase	Braak NFT Stage	CERAD NP score
NA45	UCD	4G8	90+	Female	White	31	Intermediate	Y			VI	moderate
NA22	UCD	4G8	90+	Female	White	17	High	Y	DLBD		V	moderate
NA28	UCD	4G8	85	Female	White	11	High	N	VaD		VI	frequent
NA27	UCD	4G8	70	Male	White	4	High	N	TLBD		VI	frequent
NA6	UCD	4G8	59	Female	White	5	High	Y	note: early onset AD		VI	frequent
NA16	UCD	4G8	86	Female	Hispanic		High	N			VI	frequent
NA19	UCD	4G8	66	Female	African American	5	High	N	TLBD	4	V	frequent
NA42	UCD	4G8	90+	Female	Hispanic	4	High	Y		5	VI	frequent
NA21	UCD	4G8	80	Male	White	3	High	N		5	VI	frequent
NA7	UCD	4G8	87	Male	White	25	Low	Y		2	IV	sparse
NA37	UCD	4G8	86	Female	African American	13	High	Y	Hippocampal Sclerosis	3	V	frequent
NA26	UCD	4G8	72	Female	White	45	Intermediate	Y		3	IV	frequent
NA35	UCD	4G8	82	Male	Hispanic	5	High	Y		5	VI	frequent
NA23	UCD	4G8	89	Male	White	3	High	Y	VaD	4	IV	moderate
NA46	UCD	4G8	88	Female	White	4	Intermediate	N	TLBD	3	V	moderate
NA15	UCD	4G8	90+	Female	Asian	11	Intermediate	Y		3	V	moderate
NA49	UCD	4G8	88	Male	White	10	High	Y		4	V	frequent
cw13-0	Pitt	NAB228	72	Male	White	11	Low		Remote infarct (R thalamus)	1	IV	sparse
cw15-29	Pitt	NAB228	85	Female	White	5	Intermediate		Hippocampal Sclerosis	3	III	frequent
cw15-31	Pitt	NAB228	93	Male		13	Intermediate		LBD (olfactory)	5	IV	moderate
cw15-12	Pitt	NAB228	76	Female	White	21	Low		PSP, FTLD-TDP	2	I	negative
cw16-4	Pitt	NAB228	75	Female	White	17	Intermediate		PSP	3	II	frequent
cw16-36	Pitt	NAB228	53	Male	White		Low			2	I	negative
cw17-32	Pitt	NAB228	63	Male	White	8	High		MSA (with associated mild Lewy pathology), ARTAG	5	VI	frequent
cw17-34	Pitt	NAB228	67	Female	White	3	High			5	VI	frequent
cw17-41	Pitt	NAB228	83	Male	White	10	High		DLB (neocortical), LATE, ARTAG	5	VI	frequent
cw17-3	Pitt	NAB228	86	Female	White	10	High		LATE, ARTAG	5	VI	frequent
cw17-11	Pitt	NAB228	82	Male	White	5	High		DLB (neocortical)	5	VI	frequent
cw18-33	Pitt	NAB228	68	Male	White	11	High		DLB (neocortical), LATE, HS, ARTAG	5	VI	frequent
cw18-48	Pitt	NAB228	88	Female	White	10	Intermediate		ARTAG	4	III	moderate
cw18-10	Pitt	NAB228	70	Female	White	10	High		LBD (olfactory)	5	VI	frequent
cw18-2	Pitt	NAB228	94	Male	White	5	Intermediate		ARTAG, multiple remote microinfarcts, remote lacuNAr infarct cerebellum	4	IV	moderate
cw18-18	Pitt	NAB228	81	Female	White	17.5	High		DLB (limbic), ARTAG	5	VI	frequent
17-3	UTSW	6.00E+10	68	Female	White	17	High	No	LBD (amygdala/olfactory bulbs only)	5	VI	frequent
47-3	UTSW	6.00E+10	85	Female	White	41	High	Yes	LBD (amygdala/olfactory bulbs only)	4	V	frequent
24-3	UTSW	6.00E+10	69	Female	White	11	High	No	LBD (amygdala only)	5	VI	frequent
40-3	UTSW	6.00E+10	61	Female	White	16	High	Yes	LBD (limbic stage)	5	VI	frequent
13-3	UTSW	6.00E+10	81	Male	White	9	High	Yes	LBD (olfactory bulb only); remote cerebellar infarct	5	VI	frequent
44-3	UTSW	6.00E+10	67	Male	White	13	High	Yes	None	5	VI	frequent
3-Aug	UTSW	6.00E+10	78	Male	White	11	High	Yes	LATE (hippocampal stage) with HS	5	V	frequent
20-3	UTSW	6.00E+10	75	Male	White	26	High	Yes	ARTAG	5	VI	frequent
25-3	UTSW	6.00E+10	82	Female	White	25	High	Yes	LATE (hippocampal stage)	5	VI	frequent
14-3	UTSW	6.00E+10	87	Male	White	31	Intermediate	Yes	Remote infarct, frontal subcortical WM	4	III	moderate
Abbreviations: DLBD= Diffuse Lewy body disease, PMI=post mortem interval, NFT=neurofibrillary tangle, TLBD= Transitional Lewy body disease, WM=White matter, Pitt= University of Pittsburgh, UTSW=University of Texas Southwestern, UCD=University of California Davis, VaD=Vascular Dementia
